# Supplementary material for: Associations between SNPs in Intestinal Cholesterol Absorption and Endogenous Cholesterol Synthesis Genes with Cholesterol Metabolism
Source: MDPI journal article supplement (doi:10.3390/biomedicines9101475), 2021-10-14
Supplement: s1 [file s1]

**SUPPLEMENTAL INFORMATION:**

**Associations between SNPs in Intestinal Cholesterol Absorption and Endogenous Cholesterol Synthesis Genes with Cholesterol Metabolism**

Maite M. Schroor <sup>1,\*†</sup>, Fatma B.A. Mokhtar <sup>1,\*†</sup>, Jogchum Plat <sup>1</sup> and Ronald P. Mensink <sup>1</sup>

<sup>1</sup> Department of Nutrition and Movement Sciences, NUTRIM School of Nutrition and Translational Research in Metabolism, Maastricht University, 6200 MD Maastricht, The Netherlands.

\* Correspondence: fatma.mokhtar@maastrichtuniversity.nl; Tel.: +31 (0)43 3881313 (F.B.A.M.); maite.schroor@maastrichtuniversity.nl; Tel.: +31 (0)43 3884258 (M.M.S.).

† These authors contributed equally to this work.

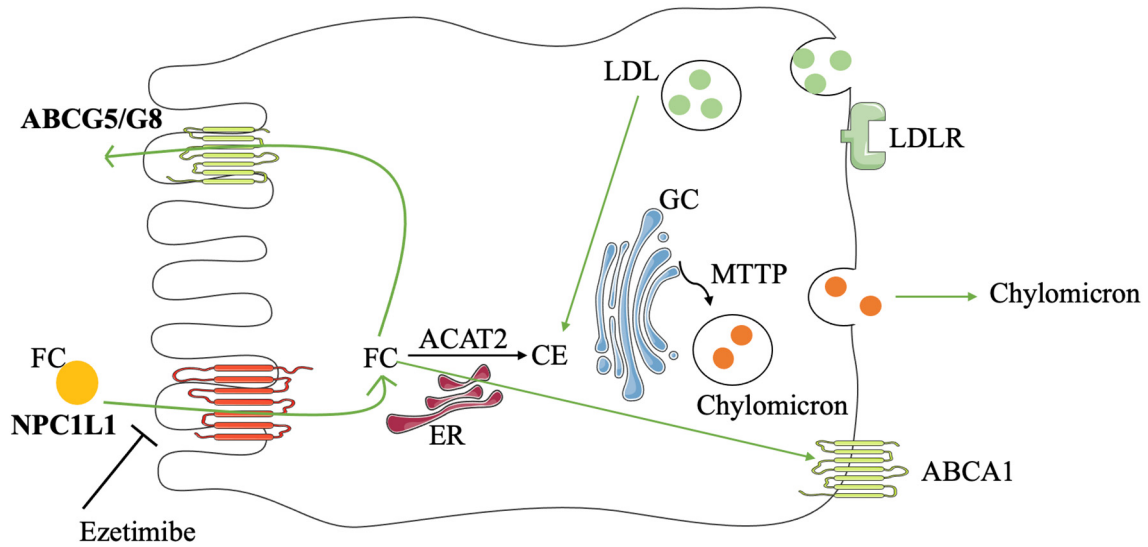

**Figure S1.** Schematic overview of the intestinal cholesterol absorption pathway. Free cholesterol (FC) enters the enterocyte via Niemann-Pick C1-like 1 (NPC1L1) and is esterified by Acetyl-CoA Acetyltransferase 2 (ACAT2) in the endoplasmic reticulum (ER). FC can also be transported back into the intestinal lumen via ATP-binding cassette member 5 and 8 (ABCG5/G8). Low-density lipoprotein (LDL) is taken up from the basolateral side via LDL receptor-mediated endocytosis. FC is also used by ATP-binding cassette A1 (ABCA1) to form high-density lipoprotein. Cholesterol ester (CE) is further processed in the Golgi complex (GC) with other components to form chylomicrons which are further transported to the lymphatic system. The drug ezetimibe is a NPC1L1 blocker and thus inhibits intestinal cholesterol absorption.

**Note:** Single-nucleotide polymorphisms in genes in bold have been included in the present study.

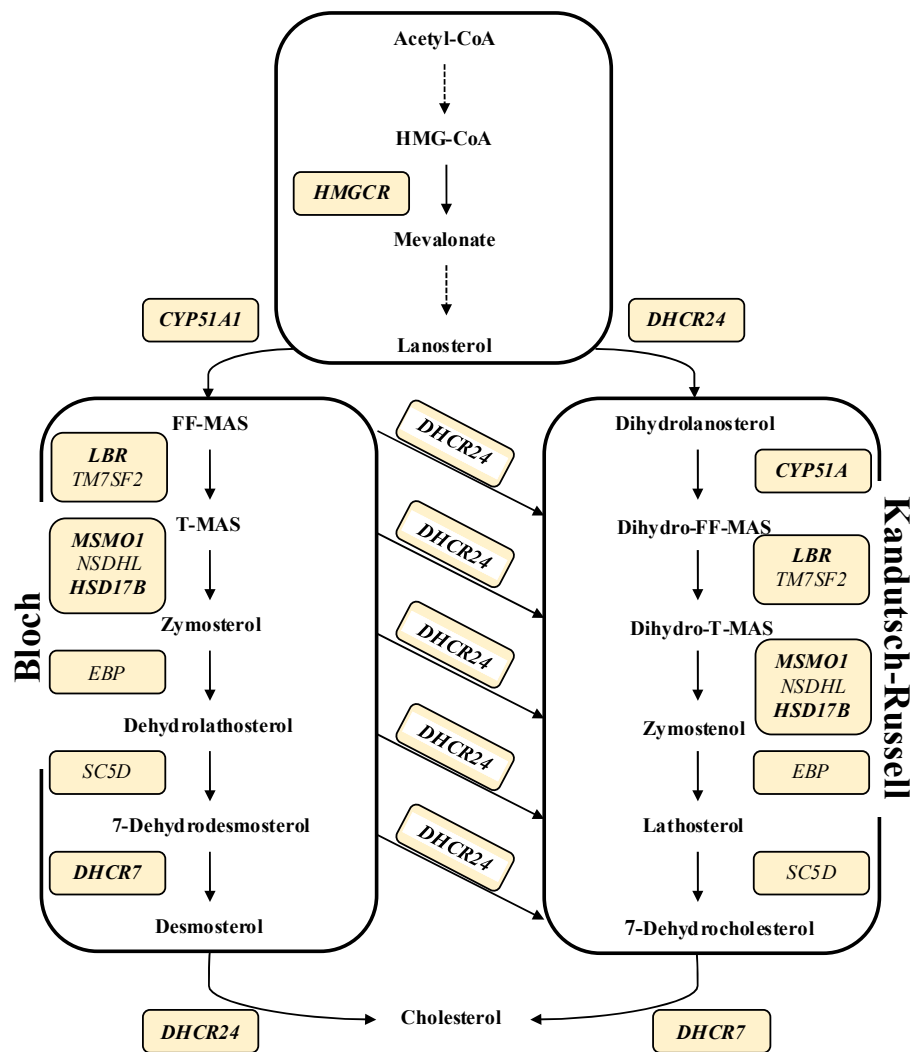

**Figure S2.** The endogenous cholesterol synthesis pathway. Cholesterol is synthesized via the Bloch and/or Kandutsch-Russell pathway. Similar enzymes are involved in these pathways, but intermediates differ.

**Note:** Single-nucleotide polymorphisms in genes in bold have been included in the present study.

**Table S1.** List of full names of genes included in the present study.

| Gene symbol/ HGNC            | Approved gene name in HGNC                        |
|------------------------------|---------------------------------------------------|
| Cholesterol absorption genes |                                                   |
| <i>ABCG5</i>                 | ATP binding cassette subfamily G member 5         |
| <i>ABCG8</i>                 | ATP binding cassette subfamily G member8          |
| <i>NPC1L1</i>                | NPC1 like intracellular cholesterol transporter 1 |
| Cholesterol synthesis genes  |                                                   |
| <i>CYP51A1</i>               | Cytochrome P450 family 51 subfamily A member 1    |
| <i>DHCR7</i>                 | 7-dehydrocholesterol reductase                    |
| <i>DHCR24</i>                | 24-dehydrocholesterol reductase                   |
| <i>HMGCR</i>                 | 3 -hydroxy-3-methylglutaryl-CoA reductase         |
| <i>HSD17B7</i>               | Hydroxysteroid 17-beta dehydrogenase 7            |
| <i>LBR</i>                   | Lamin B receptor                                  |
| <i>MSMO1</i>                 | Methylsterol monooxygenase 1                      |

**Abbreviation:** HGNC = Human Genome Organisation (HUGO) Gene Nomenclature Committee.

**Table S2.** Information given by the Precision Medicine Research Array for the two SNPs in *ABCG8* with an unknown rs-number.

| Affymetrix<br>SNP ID | Transcript<br>ID Ensembl | SNP<br>Location | Accession<br>Number<br>Nucleotide<br>Database<br>NCBI | Gene                                                 |              |                    |
|----------------------|--------------------------|-----------------|-------------------------------------------------------|------------------------------------------------------|--------------|--------------------|
|                      |                          |                 |                                                       | Full name                                            | Abbreviation | NCBI<br>Gene<br>ID |
| AX_11180448          | ENST00000272286          | Missense        | NM_022437                                             | ATP-binding cassette, sub-family G (WHITE), member 8 | ABCG8        | 64241              |
| AX_82902928          | ENST00000272286          | Intron          | NM_022437                                             | ATP-binding cassette, sub-family G (WHITE), member 8 | ABCG8        | 64241              |

**Accession Number Nucleotide Database NCBI** = reference sequence of mRNA which links to the nucleotide database of NCBI; **Affymetrix SNP ID** = a unique Affymetrix identifier for the SNP; **NCBI Gene ID** = ID for a specific gene provided by NCBI; **Transcript ID Ensembl** = an identifier for the transcripts in the Ensembl database.

**Table S3.** Baseline characteristics for all participants and stratified by study.

|                                       | All subjects | Study 1      | Study 2      | Study 3      | Study 4      | Study 5      | P-value |
|---------------------------------------|--------------|--------------|--------------|--------------|--------------|--------------|---------|
| Age (years)                           | 45.4 ± 15.3  | 33.0 ± 14.9  | 31.2 ± 13.8  | 50.0 ± 11.9  | 53.0 ± 10.1  | 33.0 ± 12.2  | <0.001  |
| Body mass index (kg/m <sup>2</sup> )* | 25.1 ± 3.6   | 23.1 ± 2.9   | 22.8 ± 2.5   | 25.3 ± 3.0   | 26.3 ± 3.6   | 23.9 ± 2.8   | <0.001  |
| Underweight                           | 7 (1.5)      | 3 (2.8)      | 1 (2.9)      | 0 (0.0)      | 3 (1.2)      | 0 (0.0)      |         |
| Normal weight                         | 225 (49.3)   | 76 (70.4)    | 27 (79.4)    | 18 (46.2)    | 92 (35.8)    | 12 (66.7)    |         |
| Overweight                            | 179 (39.3)   | 27 (25.0)    | 6 (17.6)     | 21 (53.8)    | 119 (46.3)   | 6 (33.3)     | < 0.001 |
| Obesity class I                       | 28 (6.1)     | 2 (1.9)      | 0 (0.0)      | 0 (0.0)      | 26 (10.1)    | 0 (0.0)      |         |
| Obesity class II                      | 6 (1.3)      | 0 (0.0)      | 0 (0.0)      | 0 (0.0)      | 6 (2.3)      | 0 (0.0)      |         |
| Obesity class III                     | 0 (0.0)      | 0 (0.0)      | 0 (0.0)      | 0 (0.0)      | 0 (0.0)      | 0 (0.0)      |         |
| Females                               | 245 (55.7)   | 69 (63.9)    | 23 (67.6)    | 23 (59.0)    | 128 (49.8)   | 11 (61.1)    | 0.064   |
| Smoking**                             | 55 (12.1)    | 21 (19.4)    | N/A          | 4 (10.3)     | 30 (11.7)    | 0 (100)      | <0.001  |
| Lipids                                |              |              |              |              |              |              |         |
| TC                                    | 5.50 ± 1.02  | 4.95 ± 0.79  | 4.97 ± 0.91  | 5.95 ± 0.84  | 5.73 ± 1.05  | 5.38 ± 0.83  | <0.001  |
| HDL-C                                 | 1.46 ± 0.41  | 1.60 ± 0.38  | 1.42 ± 0.34  | 1.46 ± 0.44  | 1.40 ± 0.43  | 1.59 ± 0.33  | <0.001  |
| LDL-C                                 | 3.54 ± 0.95  | 2.93 ± 0.76  | 3.05 ± 0.89  | 3.93 ± 0.83  | 3.82 ± 0.91  | 3.20 ± 0.76  | <0.001  |
| TAG                                   | 0.97 (0.93 – | 0.82 (0.75 – | 0.99 (0.86 – | 1.05 (0.88 – | 1.00 (0.94 – | 1.25 (1.06 – | <0.001  |
| Non-cholesterol sterols***            |              |              |              |              |              |              |         |
| Lathosterol                           | 107 ± 55     | 104 ± 35     | 131 ± 40     | 113 ± 54     | 101 ± 61     | 153 ± 70     | <0.001  |
| Sitosterol                            | 137 ± 65     | 121 ± 44     | 153 ± 66     | 166 ± 54     | 136 ± 71     | 155 ± 60     | <0.001  |
| Campesterol                           | 214 ± 120    | 321 ± 100    | 241 ± 126    | 256 ± 96     | 156 ± 95     | 249 ± 92     | <0.001  |

**Abbreviations:** HDL-C = high-density lipoprotein cholesterol; LDL-C = low-density lipoprotein cholesterol; TAG = triacylglycerol; TC = total cholesterol.

**Note:** Categorical data are presented as n (%), and continuous data as mean ± SD. For TAG, the mean and (95% CI) are presented after back-transformation of the log-transformed values. Lipids are presented in mmol/L and the non-cholesterol sterols in 10<sup>2</sup> × μmol/mmol cholesterol.

\* BMI data presented for N = 445, as data were unavailable for N = 11 in Study 4. BMI categories: underweight <18.5 kg/m<sup>2</sup>, normal weight 18.5 – 24.9 kg/m<sup>2</sup>, overweight 25.0 – 29.9 kg/m<sup>2</sup>, obesity class I 30.0 – 34.9 kg/m<sup>2</sup>, obesity class II 35.0 – 39.9 kg/m<sup>2</sup>, and obesity class III ≥40 kg/m<sup>2</sup> [1].

\*\* Smoking data presented for N = 410, because data were unavailable for N = 34 in S2 and for N = 12 in Study 4.

\*\*\* Non-cholesterol sterol levels presented for N = 455, because data were unavailable for N = 1 in Study 2.

**Table S4.** Associations between intestinal cholesterol absorption markers, an endogenous cholesterol synthesis marker and serum LDL-C concentrations.

| Independent Variable | Dependent Variable | t      | $\beta$ | 95 % CI for $\beta$ |             | P-value |
|----------------------|--------------------|--------|---------|---------------------|-------------|---------|
|                      |                    |        |         | Lower Bound         | Upper Bound |         |
| Sitosterol           | Campesterol        | 42.424 | 1.39    | 1.321               | 1.449       | <0.001  |
| Sitosterol           | Lathosterol        | -2.253 | -0.09   | -0.169              | -0.012      | 0.025   |
| Campesterol          | Lathosterol        | -3.733 | -0.10   | -0.146              | -0.045      | <0.001  |
| Campesterol          | LDL-C              | 0.335  | 0.00    | -0.001              | 0.001       | 0.738   |
| Sitosterol           | LDL-C              | 0.277  | 0.00    | -0.001              | 0.001       | 0.782   |
| Lathosterol          | LDL-C              | -0.403 | 0.00    | -0.002              | 0.001       | 0.687   |

**Abbreviations:** LDL-C = low-density lipoprotein cholesterol

**Note:** Non-cholesterol sterols are presented in  $10^2 \times \mu\text{mol}/\text{mmol}$  cholesterol and LDL-C in mmol/L. All results were obtained from a linear regression analysis adjusted for the factor study.

**Table S5.** The location and allele frequencies for various SNPs in intestinal cholesterol absorption and endogenous cholesterol synthesis genes for 456 participants.

| Gene                          | SNP          | Location | Call rate (%) | Alleles   | Frequencies |                  | HWE     |
|-------------------------------|--------------|----------|---------------|-----------|-------------|------------------|---------|
|                               |              |          |               |           | Our cohort  | European Cohort* |         |
|                               | rs-number    |          |               | (Ref/Alt) | (Ref/Alt)   | (Ref/Alt)        | P-value |
| <i>Cholesterol absorption</i> |              |          |               |           |             |                  |         |
| <i>ABCG5</i>                  | rs10208987   | Intron   | 99.8          | T/G       | 0.938/0.062 | 0.928/0.072      | 0.065   |
|                               | rs4148189    | Intron   | 100           | C/T       | 0.899/0.101 | 0.888/0.112      | 0.741   |
|                               | rs4245786    | Intron   | 100           | G/A       | 0.240/0.760 | 0.236/0.764      | 0.487   |
|                               | rs7599296    | Intron   | 100           | G/A       | 0.813/0.188 | 0.832/0.168      | 0.751   |
|                               | rs4148184    | Intron   | 99.8          | C/T       | 0.597/0.403 | 0.619/0.381      | 0.999   |
|                               | rs13396273   | Intron   | 100           | C/T       | 0.649/0.351 | 0.640/0.360      | 0.518   |
| <i>ABCG8</i>                  | AX_11180448* | Missense | 100           | G/C       | 0.932/0.068 | -                | 0.033   |
|                               | rs4148207    | Intron   | 100           | T/C       | 0.593/0.407 | 0.610/0.390      | 0.532   |
|                               | rs4299376    | Intron   | 98.2          | G/T       | 0.320/0.680 | 0.323/0.677      | 0.004   |
|                               | rs41360247   | Intron   | 100           | T/C       | 0.939/0.061 | 0.937/0.063      | 0.008   |
|                               | rs6544713    | Intron   | 100           | T/C       | 0.310/0.690 | 0.322/0.678      | 0.019   |
|                               | rs4245791    | Intron   | 100           | C/T       | 0.311/0.689 | 0.327/0.673      | 0.021   |
|                               | rs13390041   | Intron   | 100           | A/G       | 0.543/0.457 | 0.554/0.446      | 0.694   |
|                               | rs6709904    | Intron   | 100           | A/G       | 0.902/0.098 | 0.884/0.116      | 0.158   |
|                               | rs4077440    | Intron   | 99.8          | T/C       | 0.442/0.558 | 0.439/0.561      | 0.511   |
|                               | rs3795860    | Intron   | 100           | T/C       | 0.538/0.462 | 0.559/0.441      | 0.581   |
|                               | AX_82902928* | Intron   | 100           | AC/-      | 0.356/0.644 | -                | 0.089   |
|                               | rs55924588   | Intron   | 100           | T/C       | 0.950/0.050 | 0.935/0.065      | 0.257   |



|                              |             |            |      |        |             |             |       |
|------------------------------|-------------|------------|------|--------|-------------|-------------|-------|
| <i>NPC1L1</i>                | rs217429    | Intron     | 100  | A/C    | 0.754/0.246 | 0.751/0.249 | 0.898 |
|                              | rs217416    | Intron     | 99.6 | T/C    | 0.736/0.264 | 0.737/0.263 | 0.105 |
|                              | rs11763759  | Intron     | 99.6 | T/C    | 0.683/0.317 | 0.697/0.303 | 0.562 |
|                              | rs2072183   | Synonymous | 99.8 | G/C    | 0.769/0.231 | 0.774/0.226 | 0.100 |
| <i>Cholesterol synthesis</i> |             |            |      |        |             |             |       |
| <i>CYP51A1</i>               | rs35968894  | Intron     | 100  | A/G    | 0.599/0.401 | 0.626/0.374 | 0.634 |
| <i>DHCR7</i>                 | rs1792275   | Intron     | 99.8 | C/T    | 0.053/0.947 | 0.054/0.946 | 0.235 |
|                              | rs72954301  | Upstream   | 100  | G/T    | 0.894/0.106 | 0.913/0.087 | 0.288 |
| <i>DHCR24</i>                | rs77668549  | Intron     | 99.8 | A/G    | 0.866/0.134 | 0.884/0.116 | 0.379 |
|                              | rs7553385   | Intron     | 100  | A/G    | 0.938/0.062 | 0.942/0.058 | 0.300 |
|                              | rs7551288   | Intron     | 99.8 | A/G    | 0.403/0.597 | 0.430/0.570 | 0.243 |
|                              | rs11206456  | Intron     | 100  | C/T    | 0.917/0.083 | 0.905/0.095 | 0.512 |
|                              | rs111480286 | Intron     | 100  | ACAG/- | 0.934/0.066 | 0.941/0.059 | 0.434 |
|                              | rs6676774   | Intron     | 100  | G/A    | 0.607/0.393 | 0.609/0.391 | 0.865 |
|                              | rs718265    | Synonymous | 100  | A/G    | 0.303/0.697 | 0.310/0.690 | 0.784 |
| <i>HMGCR</i>                 | rs12654264  | Intron     | 100  | A/T    | 0.620/0.380 | 0.617/0.383 | 0.232 |
|                              | rs3846662   | Intron     | 100  | A/G    | 0.553/0.447 | 0.564/0.436 | 0.319 |
|                              | rs3846663   | Intron     | 99.8 | C/T    | 0.619/0.381 | 0.618/0.382 | 0.155 |
|                              | rs12916     | Prime UTR  | 100  | T/C    | 0.587/0.413 | 0.594/0.06  | 0.342 |
| <i>HSD17B7</i>               | rs77482353  | Intron     | 99.1 | A/G    | 0.597/0.403 | 0.649/0.351 | 0.302 |
| <i>LBR</i>                   | rs6678087   | Intron     | 99.8 | T/C    | 0.163/0.837 | 0.585/0.415 | 0.868 |
|                              | rs12141732  | Intron     | 99.8 | T/C    | 0.712/0.288 | 0.700/0.300 | 0.395 |
|                              | rs4653635   | Intron     | 100  | A/G    | 0.163/0.837 | 0.151/0.849 | 0.688 |
|                              | rs12410357  | Intron     | 100  | G/A    | 0.889/0.111 | 0.875/0.125 | 0.449 |
| <i>MSMO1</i>                 | rs17585739  | Synonymous | 100  | G/A    | 0.944/0.056 | 0.938/0.062 | 0.611 |
|                              | rs17046216  | Intron     | 100  | T/A    | 0.658/0.342 | 0.671/0.329 | 0.939 |

**Abbreviations:** Alt = Alternative allele; HWE = Hardy-Weinberg Equilibrium; Ref = Reference allele; SNP = single-nucleotide polymorphism.

\* European cohort data (release version: 20201027095038) were obtained on January the 28<sup>th</sup>, 2021 from NCBI [2]. *HSD17B7* (rs7748253) was merged into rs11590043 on July the 1<sup>st</sup>, 2015.

\*\* SNPs with unknown rs-numbers and European cohort frequencies.

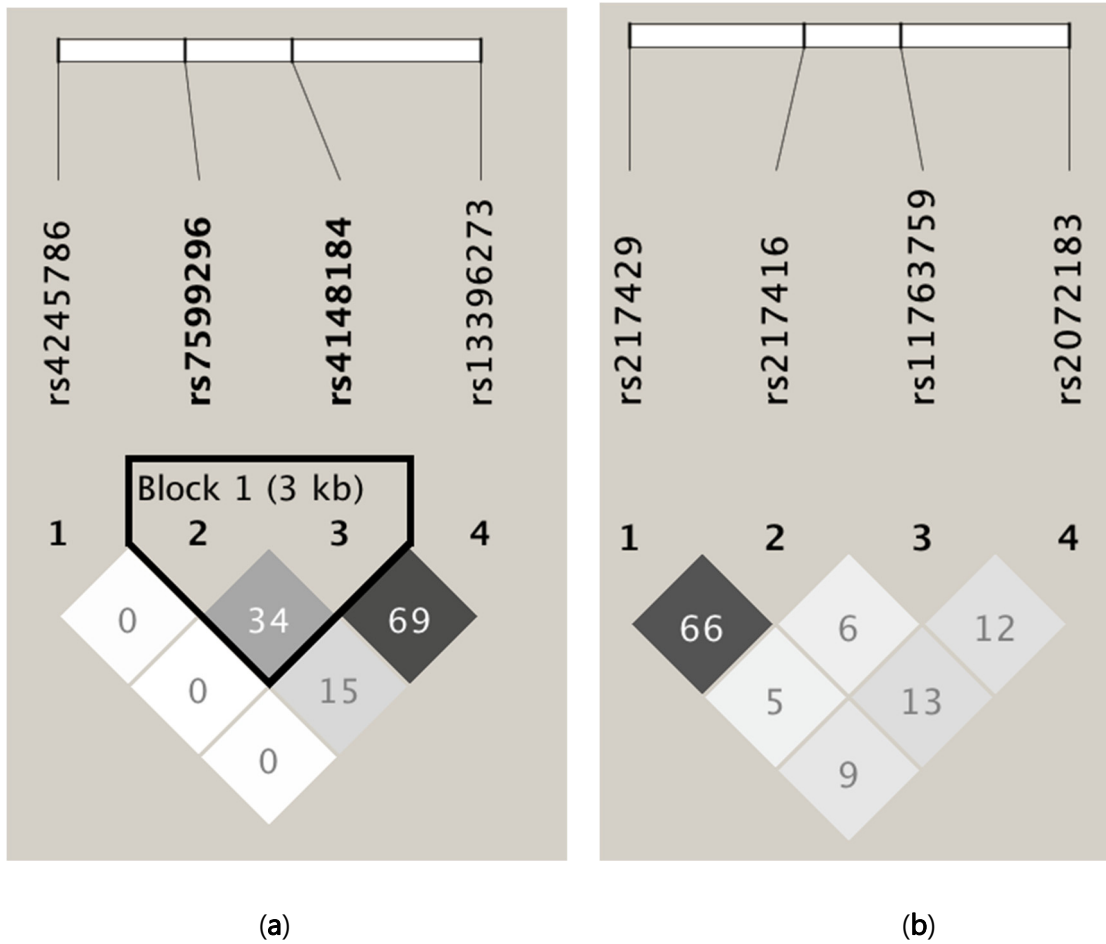

**Figure S3.** Pairwise LD among SNPs in (a) *ABCG5* and (b) *NPC1L1* is indicated in the diamond shapes. The triangle marks the haplotype block within each region (based on the confidence interval of  $D'$ ). The shading with a dark grey to white gradient indicates higher to lower LD between each pair of SNPs based on the  $r^2$ -value. The LD plots were created by Haploview version 4.1 [3].

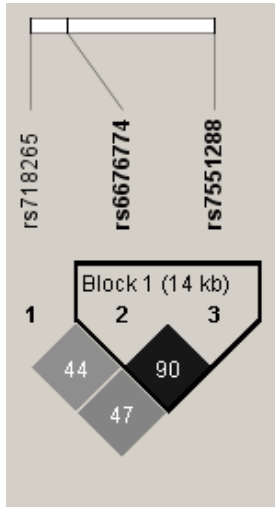

(a)

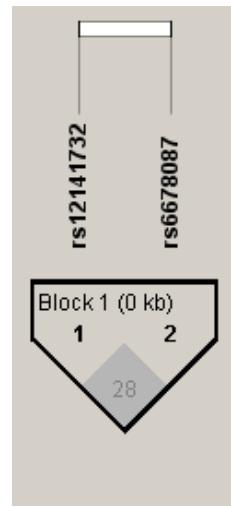

(b)

**Figure S4.** Pairwise LD among SNPs in (a) *DHCR24*, and (b) *LBR* is indicated in the diamond shapes. The triangle marks the haplotype block within each region (based on the confidence interval of  $D'$ ). The shading with a dark grey to white gradient indicates higher to lower LD between each pair of SNPs based on the  $r^2$ -value. The LD plots were created by Haploview version 4.1 [3].

**Table S6.** Associations between various SNPs in cholesterol absorption genes, that were either captured by a tag SNP or contained a genotype group < 12 individuals, with serum TC-standardized campesterol, sitosterol and lathosterol levels (N = 455), and serum LDL-C concentrations (N = 456).

| Gene         | SNP         | Genotype | N   | Campesterol                   |              | Sitosterol                    |              | Lathosterol                   |              | N   | LDL-C              |         |
|--------------|-------------|----------|-----|-------------------------------|--------------|-------------------------------|--------------|-------------------------------|--------------|-----|--------------------|---------|
|              |             |          |     | 10 <sup>2</sup> ×μmol/mmol TC |              | 10 <sup>2</sup> ×μmol/mmol TC |              | 10 <sup>2</sup> ×μmol/mmol TC |              |     | mmol/l             |         |
|              |             |          |     | Mean (95% CI)                 | P-value      | Mean (95% CI)                 | P-value      | Mean (95% CI)                 | P-value      |     | Mean (95% CI)      | P-value |
| <i>ABCG5</i> | rs10208987  | TT       | 403 | 249 (235 – 263)               | <b>0.041</b> | 149 (140 – 158) <sup>A</sup>  | <b>0.018</b> | 119 (111 – 127)               | 0.340        | 403 | 3.39 (3.27 – 3.51) | 0.900   |
|              |             | TG       | 47  | 214 (184 – 244)               |              | 124 (104 – 143) <sup>B</sup>  |              | 131 (115 – 148)               |              | 48  | 3.38 (3.12 – 3.64) |         |
|              |             | GG       | 4   | 195 (98 – 292)                |              | 112 (50 – 175)                |              | 124 (70 – 178)                |              | 4   | 3.19 (2.33 – 4.05) |         |
|              | rs4148189   | TT       | 4   | 290 (192 – 388)               | 0.137        | 158 (94 – 221)                | 0.236        | 114 (60 – 167)                | <b>0.005</b> | 4   | 2.94 (2.08 – 3.80) | 0.533   |
|              |             | TC       | 83  | 227 (204 – 251)               |              | 136 (121 – 151)               |              | 137 (125 – 150) <sup>A</sup>  |              | 84  | 3.43 (3.22 – 3.63) |         |
|              |             | CC       | 368 | 249 (234 – 263)               |              | 149 (140 – 158)               |              | 116 (108 – 124) <sup>B</sup>  |              | 368 | 3.38 (3.25 – 3.51) |         |
| <i>ABCG8</i> | AX_11180448 | CC       | 5   | 193 (106 – 280)               | <b>0.040</b> | 126 (70 – 182)                | <b>0.022</b> | 150 (102 – 198)               | 0.427        | 5   | 3.05 (2.28 – 3.81) | 0.381   |
|              |             | CG       | 51  | 217 (189 – 245)               |              | 125 (107 – 143) <sup>A</sup>  |              | 117 (101 – 132)               |              | 52  | 3.28 (3.03 – 3.52) |         |
|              |             | GG       | 399 | 250 (236 – 264)               |              | 150 (141 – 159) <sup>B</sup>  |              | 121 (113 – 129)               |              | 399 | 3.41 (3.29 – 3.54) |         |
|              | rs4299376*  | TT       | 194 | 220 (204 – 237) <sup>A</sup>  | <0.001\$     | 130 (119 – 140) <sup>A</sup>  | <0.001\$     | 124 (114 – 133)               | 0.577        | 194 | 3.34 (3.19 – 3.49) | 0.662   |
|              |             | TG       | 220 | 256 (239 – 272) <sup>B</sup>  |              | 153 (143 – 164) <sup>B</sup>  |              | 118 (109 – 128)               |              | 221 | 3.41 (3.27 – 3.56) |         |
|              |             | GG       | 33  | 320 (286 – 254) <sup>C</sup>  |              | 201 (179 – 222) <sup>C</sup>  |              | 117 (98 – 137)                |              | 33  | 3.36 (3.05 – 3.67) |         |
|              | rs41360247  | TT       | 405 | 249 (235 – 264)               | 0.052        | 150 (141 – 159)               | <b>0.031</b> | 120 (113 – 128)               | 0.468        | 405 | 3.42 (3.29 – 3.54) | 0.239   |
|              |             | TC       | 45  | 216 (187 – 246)               |              | 124 (105 – 144)               |              | 119 (102 – 135)               |              | 46  | 3.22 (2.97 – 3.48) |         |
|              |             | CC       | 5   | 193 (106 – 280)               |              | 126 (70 – 182)                |              | 150 (102 – 198)               |              | 5   | 3.05 (2.28 – 3.81) |         |
|              | rs6544713*  | TT       | 33  | 316 (282 – 350) <sup>A</sup>  | <0.001\$     | 198 (176 – 220) <sup>A</sup>  | <0.001\$     | 117 (98 – 137)                | 0.653        | 33  | 3.38 (3.08 – 3.69) | 0.285   |
|              |             | TC       | 216 | 256 (239 – 272) <sup>B</sup>  |              | 153 (143 – 164) <sup>B</sup>  |              | 118 (109 – 128)               |              | 217 | 3.45 (3.31 – 3.60) |         |
|              |             | CC       | 206 | 221 (205 – 237) <sup>C</sup>  |              | 130 (120 – 141) <sup>C</sup>  |              | 123 (114 – 132)               |              | 206 | 3.32 (3.17 – 3.47) |         |
|              | rs6709904   | AA       | 374 | 246 (231 – 260)               | 0.443        | 147 (137 – 156)               | 0.948        | 121 (113 – 129)               | 0.576        | 374 | 3.41 (3.28 – 3.54) | 0.306   |
|              |             | AG       | 74  | 243 (219 – 268)               |              | 145 (130 – 161)               |              | 116 (103 – 129)               |              | 75  | 3.33 (3.21 – 3.54) |         |
|              |             | GG       | 7   | 198 (124 – 272)               |              | 139 (91 – 187)                |              | 135 (95 – 176)                |              | 7   | 2.94 (2.29 – 3.59) |         |
|              | rs55924588  | TT       | 409 | 247 (232 – 261)               | 0.124        | 147 (138 – 156)               | 0.250        | 121 (113 – 128)               | 0.676        | 410 | 3.38 (3.26 – 3.50) | 0.632   |
|              |             | TC       | 46  | 223 (192 – 254)               |              | 136 (116 – 156)               |              | 117 (100 – 134)               |              | 46  | 3.45 (3.18 – 3.71) |         |
|              |             | CC       | 0   | N/A                           |              | N/A                           |              | N/A                           |              | 0   | N/A                |         |
|              | rs13390041* | AA       | 131 | 252 (232 – 272)               | 0.378        | 153 (140 – 166)               | 0.168        | 120 (109 – 131)               | 0.527        | 132 | 3.33 (3.15 – 3.50) | 0.180   |
|              |             | AG       | 213 | 245 (229 – 261)               |              | 146 (136 – 157)               |              | 123 (114 – 132)               |              | 231 | 3.46 (3.32 – 3.60) |         |
|              |             | GG       | 93  | 233 (210 – 256)               |              | 136 (122 – 151)               |              | 115 (103 – 128)               |              | 93  | 3.29 (3.09 – 3.49) |         |

**Abbreviations:** LDL-C = low-density lipoprotein cholesterol; N/A = not applicable; SNP = single-nucleotide polymorphism; TC = total cholesterol.

**Note:** All analyses were adjusted for the factor study. Data are presented as estimated marginal means (95% CI). Non-cholesterol sterol levels were missing for N = 1. Different letters within a SNP indicate significantly different non-cholesterol sterol levels between the genotypes based on a Bonferroni post-hoc test.

\* Indicates a SNP captured by a tag SNP. ‡ Additive models are presented in the supplemental material (**Table S7**).

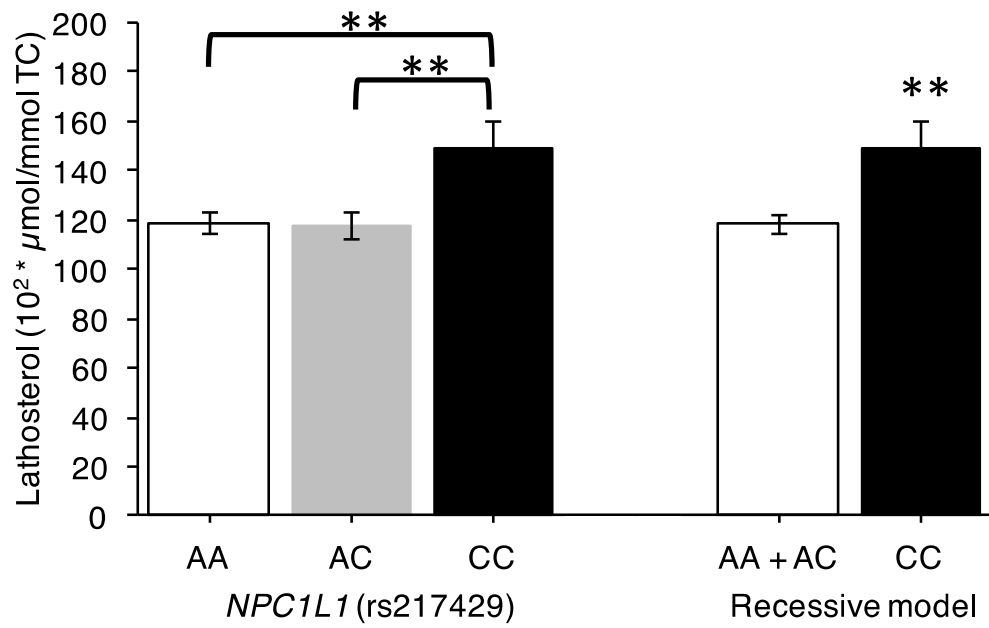

(a)

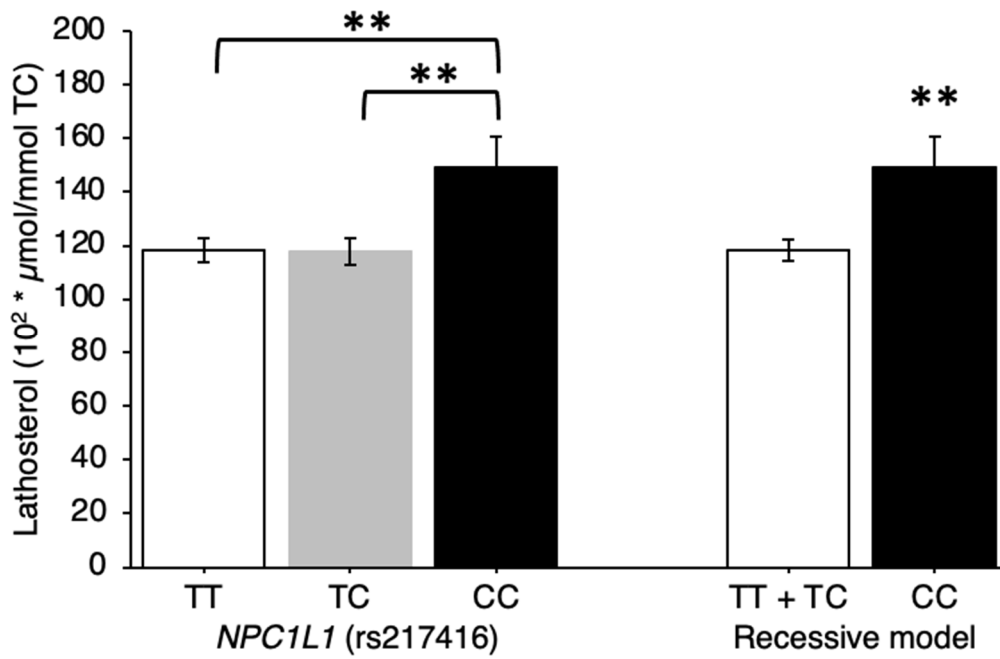

(b)

**Figure S5.** Association between SNPs (a) *NPC1L1* (rs217429) and (b) *NPC1L1* (rs217416) with serum levels of cholesterol-standardized lathosterol using recessive models. All values were adjusted for the factor study and presented as estimated marginal means  $\pm$  SE. The black bars

refer to the least frequent homozygous genotype, and the white bars refer to the most frequent homozygous genotype. \*  $p \leq 0.05$ , \*\*  $p \leq 0.01$ .

**Table S7.** Associations between SNPs in intestinal cholesterol absorption genes with TC-standardized non-cholesterol sterols using additive models (N = 455).

| Gene         | SNP       | Alleles<br>(Ref/Alt) | Marker      | t    | $\beta$ | 95 % CI for $\beta$ |             | P-value |
|--------------|-----------|----------------------|-------------|------|---------|---------------------|-------------|---------|
|              |           |                      |             |      |         | Lower Bound         | Upper Bound |         |
| <i>ABCG5</i> | rs4245786 | G/A                  | Sitosterol  | -1.4 | -6.9    | -16.5               | 2.7         | 0.161   |
| <i>ABCG8</i> | rs6544713 | T/C                  | Campesterol | 5.7  | 41.5    | 27.3                | 55.8        | <0.001  |
| <i>ABCG8</i> | rs6544713 | T/C                  | Sitosterol  | 6.2  | 28.7    | 19.6                | 37.9        | <0.001  |
| <i>ABCG8</i> | rs4245791 | C/T                  | Campesterol | 5.8  | 41.4    | 27.2                | 55.5        | <0.001  |
| <i>ABCG8</i> | rs4245791 | C/T                  | Sitosterol  | 6.2  | 28.6    | 19.5                | 37.7        | <0.001  |
| <i>ABCG8</i> | rs4299376 | G/T                  | Campesterol | 5.8  | 42.9    | 28.5                | 75.4        | <0.001  |
| <i>ABCG8</i> | rs4299376 | G/T                  | Sitosterol  | 6.3  | 29.7    | 20.4                | 38.9        | <0.001  |

**Abbreviations:** Alt = alternative allele; Ref = reference allele; SNP= single-nucleotide polymorphism

**Note:** Non-cholesterol sterols are presented in  $10^2 \times \mu\text{mol}/\text{mmol}$  total cholesterol. All results were obtained from a linear regression analysis adjusted for the factor study. The alternative allele was used as reference in the model; each copy of the reference allele changes the outcome parameter (marker) with  $\beta$ .



**Table S8.** Associations between various SNPs in genes involved in intestinal cholesterol absorption with serum total cholesterol concentrations (N = 456).

| Gene         | SNP         | Genotype | N   | Total cholesterol<br>mmol/L |         |
|--------------|-------------|----------|-----|-----------------------------|---------|
|              |             |          |     | Mean (95% CI)               | P-value |
| <i>ABCG5</i> | rs10208987  | TT       | 403 | 5.40 (5.26 – 5.53)          | 0.906   |
|              |             | TG       | 48  | 5.40 (5.11 – 5.69)          |         |
|              |             | GG       | 4   | 5.19 (4.24 – 6.14)          |         |
|              | rs4148189   | TT       | 4   | 5.13 (4.81 – 6.09)          | 0.803   |
|              |             | TC       | 84  | 5.43 (5.21 – 5.66)          |         |
|              |             | CC       | 368 | 5.39 (5.25 – 5.53)          |         |
|              | rs4245786   | AA       | 266 | 5.45 (5.29 – 5.60)          | 0.356   |
|              |             | AG       | 161 | 5.35 (5.18 – 5.53)          |         |
|              |             | GG       | 29  | 5.21 (4.85 – 5.58)          |         |
|              | rs7599296   | AA       | 15  | 5.16 (4.66 – 5.66)          | 0.616   |
|              |             | AG       | 141 | 5.42 (5.23 – 5.60)          |         |
|              |             | GG       | 300 | 5.40 (5.26 – 5.55)          |         |
|              | rs4148184   | TT       | 74  | 5.22 (4.98 – 5.46)          | 0.182   |
|              |             | TC       | 219 | 5.41 (5.24 – 5.57)          |         |
|              |             | CC       | 162 | 5.47 (5.29 – 5.65)          |         |
|              | rs13396273  | TT       | 53  | 5.25 (4.98 – 5.53)          | 0.376   |
|              |             | TC       | 214 | 5.39 (5.23 – 5.55)          |         |
|              |             | CC       | 189 | 5.46 (5.29 – 5.63)          |         |
| <i>ABCG8</i> | AX_11180448 | CC       | 5   | 5.16 (4.31 – 6.01)          | 0.463   |
|              |             | CG       | 52  | 5.27 (5.00 – 5.54)          |         |
|              |             | GG       | 399 | 5.42 (5.29 – 5.56)          |         |
|              | rs4148207   | TT       | 157 | 5.43 (5.25 – 5.61)          | 0.408   |
|              |             | TC       | 227 | 5.42 (5.26 – 5.58)          |         |
|              |             | CC       | 72  | 5.26 (5.02 – 5.50)          |         |
|              | rs4299376   | TT       | 194 | 5.33 (5.16 – 5.50)          | 0.467   |
|              |             | TG       | 221 | 5.42 (5.25 – 5.58)          |         |
|              |             | GG       | 33  | 5.52 (5.18 – 5.86)          |         |
|              | rs41360247  | TT       | 405 | 5.44 (5.30 – 5.57)          | 0.203   |
|              |             | TC       | 46  | 5.18 (4.90 – 5.47)          |         |
|              |             | CC       | 5   | 5.16 (4.31 – 6.01)          |         |
|              | rs6544713   | TT       | 33  | 5.54 (5.21 – 5.88)          | 0.151   |
|              |             | TC       | 217 | 5.46 (5.30 – 5.63)          |         |
|              |             | CC       | 206 | 5.30 (5.14 – 5.47)          |         |
|              | rs4245791   | TT       | 206 | 5.31 (5.14 – 5.47)          | 0.163   |
|              |             | TC       | 216 | 5.47 (5.31 – 5.63)          |         |
|              |             | CC       | 34  | 5.51 (5.18 – 5.85)          |         |
|              | rs13390041  | AA       | 132 | 5.41 (5.22 – 5.60)          | 0.115   |
|              |             | AG       | 231 | 5.46 (5.30 – 5.61)          |         |
|              |             | GG       | 93  | 5.21 (4.99 – 5.44)          |         |
|              | rs6709904   | AA       | 374 | 5.42 (5.28 – 5.56)          | 0.392   |
|              |             | AG       | 75  | 5.33 (5.10 – 5.56)          |         |
|              |             | GG       | 7   | 4.99 (4.27 – 5.71)          |         |
|              | rs4077440   | TT       | 92  | 5.49 (5.27 – 7.71)          | 0.066   |
|              |             | TC       | 218 | 5.46 (5.30 – 5.62)          |         |
|              |             | CC       | 145 | 5.25 (5.06 – 5.43)          |         |
|              | rs3795860   | TT       | 129 | 5.41 (5.22 – 5.60)          | 0.127   |
|              |             | TC       | 233 | 5.46 (5.30 – 5.61)          |         |
|              |             | CC       | 94  | 5.21 (5.00 – 5.44)          |         |
|              | AX_82902928 | --       | 197 | 5.45 (5.29 – 5.62)          | 0.057   |
|              |             | -AC      | 193 | 5.41 (5.24 – 5.58)          |         |
|              |             | ACAC     | 66  | 5.13 (4.88 – 5.39)          |         |
|              | rs55924588  | TT       | 410 | 5.39 (5.26 – 5.53)          | 0.645   |
|              |             | TC       | 46  | 5.46 (5.16 – 5.76)          |         |

|               |            | CC | 0   | N/A                |              |
|---------------|------------|----|-----|--------------------|--------------|
| <i>NPC1L1</i> | rs217429   | AA | 259 | 5.39 (5.24 – 5.54) | 0.938        |
|               |            | AC | 170 | 5.41 (5.23 – 5.59) |              |
|               |            | CC | 27  | 5.45 (5.08 – 5.83) |              |
|               | rs217416   | TT | 239 | 5.43 (5.28 – 5.59) | 0.698        |
|               |            | TC | 190 | 5.36 (5.18 – 5.53) |              |
|               |            | CC | 25  | 5.37 (4.90 – 5.76) |              |
|               | rs11763759 | TT | 209 | 5.42 (5.26 – 5.58) | <b>0.043</b> |
|               |            | TC | 202 | 5.31 (5.15 – 5.48) |              |
|               |            | CC | 43  | 5.71 (5.41 – 6.01) |              |
|               | rs2072183  | CC | 18  | 5.34 (4.88 – 5.80) | 0.956        |
|               |            | CG | 174 | 5.41 (5.23 – 5.59) |              |
|               |            | GG | 263 | 5.40 (5.25 – 5.54) |              |

**Abbreviations:** N/A: not applicable; SNP = single-nucleotide polymorphism.

**Note:** All analyses were adjusted for the factor study. Data are presented as estimated marginal means (95% CI). Statistical significance was set a a p-value < 0.05.

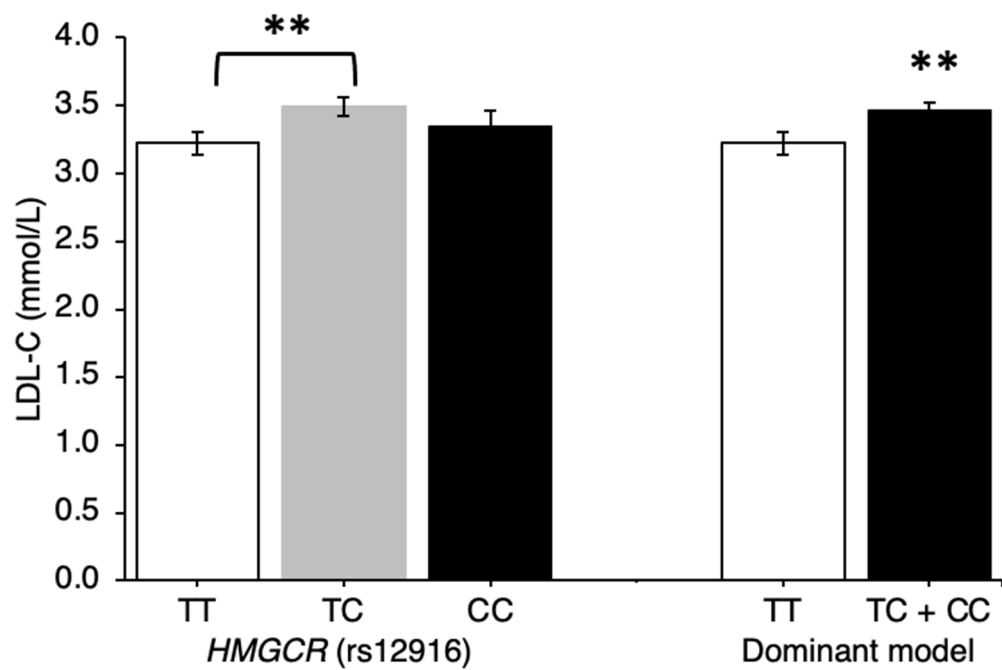

(a)

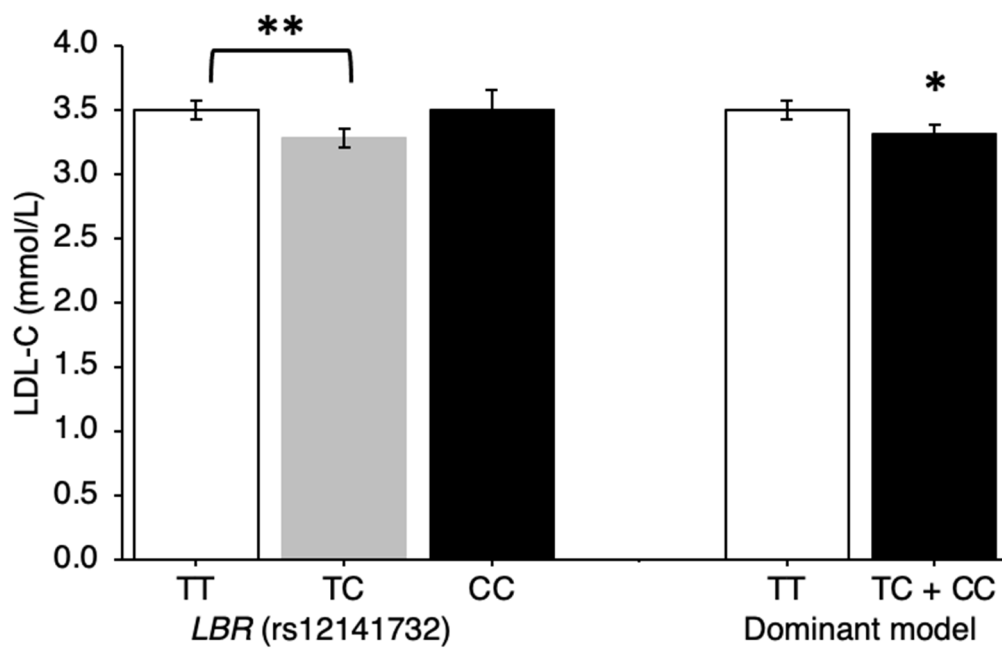

(b)

Figure S6. Association between SNPs (a) *HMGCR* (rs12916) and (e) *LBR* (rs12141732) with serum LDL-C concentrations using dominant models. All values were adjusted for the factor study and presented as estimated marginal means  $\pm$  SE. The black bars refer to the least

frequent homozygous genotype, and the white bars refer to the most frequent homozygous genotype. \*  $p \leq 0.05$ , \*\*  $p \leq 0.01$ .

**Table S9.** Associations between various SNPs in endogenous cholesterol synthesis genes, that were either captured by a tag SNP or contained a genotype group < 12 individuals, with serum TC-standardized campesterol, sitosterol and lathosterol levels (N = 455), and serum LDL-C concentrations (N = 456).

| Gene          | SNP         | Genotype | N   | Campesterol                   |         | Sitosterol                    |         | Lathosterol                   |              | N   | LDL-C                           |              |
|---------------|-------------|----------|-----|-------------------------------|---------|-------------------------------|---------|-------------------------------|--------------|-----|---------------------------------|--------------|
|               |             |          |     | 10 <sup>2</sup> ×μmol/mmol TC | P-value | 10 <sup>2</sup> ×μmol/mmol TC | P-value | 10 <sup>2</sup> ×μmol/mmol TC | P-value      |     | mmol/l                          | P-value      |
| <i>DHCR7</i>  | rs1792275   | TT       | 406 | 243 (229 – 256)               | 0.266   | 145 (136 – 154)               | 0.250   | 123 (115 – 130)               | <b>0.024</b> | 407 | 3.37 (3.24 – 3.49)              | 0.078        |
|               |             | TC       | 48  | 259 (230 – 289)               |         | 156 (137 – 175)               |         | 104 (88 – 120)                |              | 48  | 3.60 (3.34 – 3.86)              |              |
|               |             | CC       | 0   | N/A                           |         | N/A                           |         | N/A                           |              | 0   | N/A                             |              |
|               | rs72954301  | TT       | 3   | 207 (94 – 320)                | 0.537   | 121 (48 – 194)                | 0.763   | 137 (75 – 200)                | 0.828        | 3   | 3.35 (2.36 – 4.34)              | 0.837        |
|               |             | TG       | 91  | 253 (230 – 276)               |         | 148 (133 – 163)               |         | 122 (109 – 135)               |              | 91  | 3.34 (3.14 – 3.54)              |              |
|               |             | GG       | 361 | 243 (229 – 258)               |         | 146 (137 – 155)               |         | 120 (112 – 128)               |              | 362 | 3.40 (3.27 – 3.52)              |              |
| <i>DHCR24</i> | rs77668549  | AA       | 339 | 244 (229 – 258)               | 0.354   | 145 (136 – 155)               | 0.461   | 119 (111 – 127)               | 0.654        | 339 | 3.39 (3.26 – 3.52)              | 0.765        |
|               |             | AG       | 109 | 252 (230 – 273)               |         | 152 (138 – 166)               |         | 125 (113 – 137)               |              | 110 | 3.36 (3.17 – 3.55)              |              |
|               |             | GG       | 6   | 194 (115 – 274)               |         | 124 (72 – 176)                |         | 134 (90 – 178)                |              | 6   | 3.62 (2.93 – 4.32)              |              |
|               | rs7551288*  | AA       | 80  | 232 (208 – 256)               | 0.376   | 144 (128 – 159)               | 0.799   | 119 (106 – 133)               | 0.519        | 80  | 3.40 (3.19 – 3.61)              | 0.358        |
|               |             | AG       | 207 | 251 (234 – 267)               |         | 148 (138 – 159)               |         | 123 (114 – 133)               |              | 207 | 3.33 (3.18 – 3.48)              |              |
|               |             | GG       | 167 | 244 (225 – 262)               |         | 145 (133 – 157)               |         | 117 (107 – 127)               |              | 168 | 3.46 (3.30 – 3.62)              |              |
|               | rs7553385   | AA       | 401 | 246 (232 – 250)               | 0.494   | 147 (138 – 156)               | 0.725   | 121 (113 – 128)               | 0.916        | 402 | 3.39 (3.26 – 3.51)              | 0.211        |
|               |             | AG       | 51  | 229 (200 – 259)               |         | 139 (121 – 158)               |         | 119 (103 – 135)               |              | 51  | 3.34 (3.09 – 3.60)              |              |
|               |             | GG       | 3   | 261 (149 – 374)               |         | 144 (72 – 217)                |         | 109 (46 – 171)                |              | 3   | 4.25 (3.26 – 5.23)              |              |
|               | rs11206456  | TT       | 2   | 224 (86 – 362)                | 0.608   | 137 (48 – 226)                | 0.605   | 140 (64 – 216)                | 0.323        | 2   | 3.88 (2.67 – 5.09)              | 0.597        |
|               |             | TC       | 72  | 255 (230 – 280)               |         | 153 (137 – 170)               |         | 129 (115 – 143)               |              | 72  | 3.33 (3.11 – 3.55)              |              |
|               |             | CC       | 381 | 243 (229 – 257)               |         | 145 (136 – 154)               |         | 119 (111 – 127)               |              | 382 | 3.40 (3.27 – 3.52)              |              |
|               | rs111480286 | --       | 3   | 261 (149 – 374)               | 0.512   | 145 (72 – 217)                | 0.730   | 109 (46 – 171)                | 0.891        | 3   | 4.25 (3.26 – 5.23)              | 0.153        |
|               |             | -ACAG    | 54  | 230 (202 – 259)               |         | 140 (121 – 158)               |         | 118 (103 – 134)               |              | 54  | 3.29 (3.04 – 5.53)              |              |
|               |             | ACAGACAG | 398 | 246 (232 – 260)               |         | 147 (138 – 156)               |         | 121 (113 – 129)               |              | 399 | 3.39 (3.27 – 3.52)              |              |
|               | rs4653635   | AA       | 11  | 244 (185 – 304)               | 0.426   | 148 (110 – 187)               | 0.351   | 100 (68 – 133)                | 0.496        | 11  | 3.05 (2.53 – 3.57)              | 0.275        |
|               |             | AG       | 127 | 235 (214 – 255)               |         | 139 (126 – 152)               |         | 121 (109 – 132)               |              | 127 | 3.46 (3.28 – 3.63)              |              |
|               |             | GG       | 317 | 248 (233 – 263)               |         | 149 (139 – 158)               |         | 121 (113 – 129)               |              | 318 | 3.37 (3.24 – 3.50)              |              |
|               | rs12410357  | AA       | 4   | 284 (186 – 382)               | 0.728   | 138 (75 – 202)                | 0.450   | 125 (71 – 179)                | 0.690        | 4   | 4.10 (3.24 – 4.95)              | 0.219        |
|               |             | AG       | 93  | 244 (221 – 267)               |         | 139 (124 – 154)               |         | 125 (112 – 138)               |              | 93  | 3.34 (3.13 – 3.54)              |              |
|               |             | GG       | 358 | 245 (230 – 259)               |         | 148 (139 – 157)               |         | 119 (112 – 127)               |              | 359 | 3.39 (3.27 – 3.52)              |              |
| <i>HMGCR</i>  | rs12654264* | AA       | 168 | 240 (221 – 259)               | 0.699   | 144 (132 – 157)               | 0.906   | 112 (112 – 133)               | 0.820        | 169 | 3.24 (3.08 – 3.40) <sup>A</sup> | <b>0.021</b> |
|               |             | AT       | 227 | 245 (229 – 262)               |         | 147 (137 – 158)               |         | 119 (110 – 128)               |              | 227 | 3.48 (3.34 – 3.62) <sup>B</sup> |              |

|              |            |    |     |                 |       |                 |       |                 |       |     |                                 |              |
|--------------|------------|----|-----|-----------------|-------|-----------------|-------|-----------------|-------|-----|---------------------------------|--------------|
| <i>LBR</i>   | rs3846662* | TT | 60  | 253 (226 – 279) | 0.339 | 147 (130 – 165) | 0.426 | 122 (107 – 136) | 0.717 | 60  | 3.40 (3.17 – 3.63)              | <b>0.020</b> |
|              |            | AA | 134 | 239 (218 – 259) |       | 144 (131 – 157) |       | 117 (106 – 129) |       | 134 | 3.20 (3.02 – 3.38) <sup>A</sup> |              |
|              |            | AG | 235 | 243 (227 – 258) |       | 145 (134 – 155) |       | 121 (112 – 130) |       | 236 | 3.46 (3.32 – 3.59) <sup>B</sup> |              |
|              |            | GG | 86  | 258 (235 – 281) |       | 154 (140 – 169) |       | 123 (110 – 136) |       | 86  | 3.43 (3.23 – 3.63)              |              |
|              | rs3846663* | TT | 59  | 245 (218 – 272) | 0.811 | 143 (126 – 160) | 0.905 | 122 (107 – 137) | 0.809 | 59  | 3.39 (3.16 – 3.63)              | <b>0.018</b> |
|              |            | TC | 229 | 244 (228 – 260) |       | 146 (136 – 157) |       | 119 (110 – 128) |       | 229 | 3.48 (3.34 – 3.62) <sup>A</sup> |              |
|              |            | CC | 166 | 238 (220 – 257) |       | 144 (132 – 156) |       | 122 (112 – 133) |       | 167 | 3.23 (3.07 – 3.94) <sup>B</sup> |              |
|              | rs4653635  | AA | 11  | 244 (185 – 304) | 0.426 | 148 (110 – 187) | 0.351 | 100 (68 – 133)  | 0.496 | 11  | 3.05 (2.53 – 3.57)              | 0.275        |
|              |            | AG | 127 | 235 (214 – 255) |       | 139 (126 – 152) |       | 121 (109 – 132) |       | 127 | 3.46 (3.28 – 3.63)              |              |
|              |            | GG | 317 | 248 (233 – 263) |       | 149 (139 – 158) |       | 121 (113 – 129) |       | 318 | 3.37 (3.24 – 3.50)              |              |
|              |            | AA | 4   | 284 (186 – 382) | 0.728 | 138 (75 – 202)  | 0.450 | 125 (71 – 179)  | 0.690 | 4   | 4.10 (3.24 – 4.95)              | 0.219        |
| <i>MSMO1</i> | rs17585739 | AG | 93  | 244 (221 – 267) |       | 139 (124 – 154) |       | 125 (112 – 138) |       | 93  | 3.34 (3.13 – 3.54)              |              |
|              |            | GG | 358 | 245 (230 – 259) |       | 148 (139 – 157) |       | 119 (112 – 127) |       | 359 | 3.39 (3.27 – 3.52)              |              |
|              |            | AA | 2   | 231 (91 – 371)  | 0.865 | 140 (50 – 231)  | 0.759 | 91 (14 – 168)   | 0.638 | 2   | 3.23 (2.01 – 4.46)              | 0.965        |
|              |            | AT | 47  | 238 (231 – 260) |       | 140 (120 – 159) |       | 125 (109 – 142) |       | 47  | 3.40 (3.14 – 3.67)              |              |
|              |            | TT | 406 | 246 (231 – 250) |       | 147 (138 – 156) |       | 120 (112 – 128) |       | 407 | 3.39 (3.26 – 3.51)              |              |

**Abbreviations:** LDL-C = low-density lipoprotein cholesterol; N/A = not applicable; SNP = single-nucleotide polymorphism; TC = total cholesterol.

**Note:** All analyses were adjusted for the factor study. Data are presented as estimated marginal means (95% CI). Non-cholesterol sterol levels were missing for N = 1. Different letters within a SNP indicate significantly different non-cholesterol sterol levels or LDL-C concentrations between the genotypes based on a Bonferroni post-hoc test. \* Indicates a SNP captured by a tag SNP.

**Table S10.** Associations between various SNPs in genes involved in endogenous cholesterol synthesis with serum total cholesterol concentrations (N = 456).

| Gene           | SNP         | Genotype | N   | Total cholesterol<br>mmol/L     |              |
|----------------|-------------|----------|-----|---------------------------------|--------------|
|                |             |          |     | Mean (95% CI)                   | P-value      |
| <i>CYP51A1</i> | rs35968894  | AA       | 161 | 5.40 (5.22 – 5.57)              | 0.993        |
|                |             | AG       | 224 | 5.39 (5.23 – 5.56)              |              |
|                |             | GG       | 71  | 5.41 (5.17 – 5.65)              |              |
| <i>DHCR7</i>   | rs1792275   | TT       | 407 | 5.37 (5.24 – 5.51)              | 0.075        |
|                |             | TC       | 48  | 5.63 (5.35 – 5.92)              |              |
|                |             | CC       | 0   | N/A                             |              |
|                | rs72954301  | TT       | 3   | 5.50 (4.40 – 6.59)              | 0.453        |
|                |             | TG       | 91  | 5.28 (5.06 – 5.51)              |              |
|                |             | GG       | 362 | 5.43 (5.29 – 5.56)              |              |
| <i>DHCR24</i>  | rs77668549  | AA       | 339 | 5.41 (5.27 – 5.55)              | 0.738        |
|                |             | AG       | 110 | 5.36 (5.15 – 5.57)              |              |
|                |             | GG       | 6   | 5.64 (4.87 – 6.41)              |              |
|                | rs7553385   | AA       | 402 | 5.40 (5.26 – 5.53)              | 0.347        |
|                |             | AG       | 51  | 5.38 (5.09 – 5.66)              |              |
|                |             | GG       | 3   | 6.20 (5.11 – 7.29)              |              |
|                | rs7551288   | AA       | 80  | 5.44 (5.21 – 5.67)              | 0.700        |
|                |             | AG       | 207 | 5.36 (5.19 – 5.52)              |              |
|                |             | GG       | 168 | 5.43 (5.25 – 5.61)              |              |
|                | rs11206456  | TT       | 2   | 5.81 (4.47 – 7.15)              | 0.725        |
|                |             | TC       | 72  | 5.34 (5.10 – 5.59)              |              |
|                |             | CC       | 382 | 5.41 (5.27 – 5.54)              |              |
|                | rs111480286 | --       | 3   | 6.20 (5.11 – 7.29)              | 0.276        |
|                |             | -ACAG    | 54  | 5.31 (5.03 – 5.58)              |              |
|                |             | ACAGACAG | 399 | 5.40 (5.27 – 5.54)              |              |
|                | rs6676774   | AA       | 75  | 5.45 (5.21 – 5.68)              | 0.427        |
|                |             | AG       | 208 | 5.34 (5.18 – 5.50)              |              |
|                |             | GG       | 173 | 5.46 (5.28 – 5.63)              |              |
|                | rs718265    | AA       | 43  | 5.30 (5.00 – 5.61)              | 0.437        |
|                |             | AG       | 190 | 5.36 (5.20 – 5.53)              |              |
|                |             | GG       | 223 | 5.45 (5.29 – 5.62)              |              |
| <i>HMGCR</i>   | rs12654264  | AA       | 169 | 5.26 (5.08 – 5.44) <sup>A</sup> | <b>0.037</b> |
|                |             | AT       | 227 | 5.51 (5.35 – 5.66) <sup>B</sup> |              |
|                |             | TT       | 60  | 5.34 (5.08 – 5.60)              |              |
|                | rs3846662   | AA       | 134 | 5.24 (5.04 – 5.44)              | 0.087        |
|                |             | AG       | 236 | 5.47 (5.31 – 5.62)              |              |
|                |             | GG       | 86  | 5.41 (5.18 – 5.63)              |              |
|                | rs3846663   | TT       | 59  | 5.34 (5.08 – 5.60) <sup>A</sup> | <b>0.034</b> |
|                |             | TC       | 229 | 5.51 (5.35 – 5.66) <sup>B</sup> |              |
|                |             | CC       | 167 | 5.26 (5.08 – 5.44)              |              |
|                | rs12916     | TT       | 152 | 5.24 (5.06 – 5.43) <sup>A</sup> | <b>0.022</b> |
|                |             | TC       | 231 | 5.51 (5.36 – 5.67) <sup>B</sup> |              |
|                |             | CC       | 73  | 5.32 (5.08 – 5.55)              |              |
| <i>HSD17B7</i> | rs77482353  | AA       | 156 | 5.39 (5.21 – 5.57)              | 0.103        |
|                |             | AG       | 228 | 5.34 (5.18 – 5.50) <sup>A</sup> |              |
|                |             | GG       | 68  | 5.62 (5.37 – 5.87) <sup>B</sup> |              |
| <i>LBR</i>     | rs6678087   | TT       | 141 | 5.41 (5.22 – 5.60)              | 0.530        |
|                |             | TC       | 223 | 5.36 (5.20 – 5.52)              |              |
|                |             | CC       | 91  | 5.49 (5.27 – 5.71)              |              |
|                | rs12141732  | TT       | 227 | 5.52 (5.36 – 5.44) <sup>A</sup> | <b>0.032</b> |
|                |             | TC       | 194 | 5.28 (5.12 – 5.88) <sup>B</sup> |              |
|                |             | CC       | 34  | 5.54 (5.20 – 286)               |              |

|              |            |    |     |                    |       |
|--------------|------------|----|-----|--------------------|-------|
| <i>MSMO1</i> | rs4653635  | AA | 11  | 5.11 (4.53 – 5.69) | 0.600 |
|              |            | AG | 127 | 5.41 (5.21 – 5.60) |       |
|              |            | GG | 318 | 5.40 (5.26 – 5.55) |       |
|              | rs12410357 | AA | 4   | 6.34 (5.39 – 7.29) | 0.111 |
|              |            | AG | 93  | 5.33 (5.10 – 5.55) |       |
|              |            | GG | 359 | 5.41 (5.27 – 5.54) |       |
|              | rs17585739 | AA | 2   | 5.54 (4.18 – 6.90) | 0.956 |
|              |            | AT | 47  | 5.43 (5.13 – 5.72) |       |
|              |            | TT | 407 | 5.39 (5.26 – 5.53) |       |
|              | rs17046216 | AA | 53  | 5.68 (5.41 – 5.96) | 0.060 |
|              |            | AG | 206 | 5.39 (5.23 – 5.55) |       |
|              |            | GG | 197 | 5.33 (5.17 – 5.50) |       |

**Abbreviations:** N/A: not applicable; SNP = single-nucleotide polymorphism.

**Note:** All analyses were adjusted for the factor study. Data are presented as estimated marginal means (95% CI). Different letters within a SNP indicate significantly different TC concentrations between the genotypes based on a Bonferroni post-hoc test. Statistical significance was set at a p-value < 0.05.



## References

1. World Health Organization. Body mass index - BMI. Available online: <https://www.euro.who.int/en/health-topics/disease-prevention/nutrition/a-healthy-lifestyle/body-mass-index-bmi>].
2. Database of Single Nucleotide Polymorphisms (dbSNP). Bethesda (MD): National Center for Biotechnology Information, National Library of Medicine. dbSNP accession:(dbSNP Build ID: 154). Available online: <http://www.ncbi.nlm.nih.gov/SNP/>].
3. Barrett, J.C.; Fry, B.; Maller, J.; Daly, M.J. Haploview: analysis and visualization of LD and haplotype maps. *Bioinformatics* **2005**, *21*, 263-265, doi:10.1093/bioinformatics/bth457.
